# Supplementary material for: The adverse impact of a gain in chromosome 1q on the prognosis of multiple myeloma treated with bortezomib-based regimens: A retrospective single-center study in China
Source: PubMed Central journal article supplement (PMC9808074; doi:10.3389/fonc.2022.1084683), 2022-12-20
Supplement: Table_1.pdf [file Table_1.pdf]

Supplementary Table 1 Survival of patients with multiple myeloma

| Median Survival, m (95% CI)              | PFS              | P      | OS               | P      |
|------------------------------------------|------------------|--------|------------------|--------|
| Age ≤65 (n = 156)                        | 32.0 (23.7–40.3) | 0.249  | NR               | 0.011  |
| >65 (n = 102)                            | 21.2 (12.7–29.7) |        | 45.4 (33.9–56.9) |        |
| D-S 1-3A (n = 215)                       | 40.4 (25.8–38.2) | 0.023  | NR               | <0.001 |
| 2B+3B (n = 43)                           | 17.7 (15.1–20.4) |        | 33.4 (21.3–45.4) |        |
| ISS 1+2 (n = 165)                        | 32.0 (27.8–36.1) | 0.252  | NR               | <0.001 |
| 3 (n = 93)                               | 19.1 (10.0–28.3) |        | 36.2 (27.2–45.2) |        |
| Hgb <100 g/L (n = 150)                   | 29.6 (20.4–38.7) | 0.389  | NR               | 0.192  |
| ≥100 g/L (n = 108)                       | 33.3 (21.0–45.6) |        | 52.4             |        |
| Plt <150 × 10e9/L (n = 164)              | 21.8 (11.8–31.7) | 0.006  | NR               | <0.001 |
| ≥150 × 10e9/L (n = 92)                   | 33.3 (21.1–45.5) |        | 45.8 (29.0–62.6) |        |
| Cr ≤177 umol/L (n = 220)                 | 30.8 (23.2–38.4) | 0.078  | NR               | 0.001  |
| >177 umol/L (n = 38)                     | 18.6 (13.9–23.3) |        | 39.2 (28.2–50.2) |        |
| LDH ≤ UNL (n = 209)                      | 33.3 (24.5–42.2) | <0.001 | NR               | <0.001 |
| >UNL (n = 49)                            | 16.6 (11.9–21.3) |        | 33.4 (23.0–43.8) |        |
| Plasma cells ≤30% (n = 149)              | 34.4 (20.9–48.0) | <0.001 | NR               | 0.003  |
| >30% (n = 109)                           | 18.2 (12.0–24.4) |        | 45.4 (35.5–55.3) |        |
| Extramedullary lesion negative (n = 194) | 30.4 (23.2–37.7) | 0.174  | NR               | 0.464  |
| positive (n = 64)                        | 21.8 (5.4–38.1)  |        | NR               |        |
| Ca ≤ UNL (n = 215)                       | 30.8 (23.4–38.2) | 0.346  | NR               | 0.616  |
| >UNL (n = 43)                            | 23.9 (11.1–36.7) |        | NR               |        |
| CRP ≤ UNL (n = 191)                      | 30.8 (23.1–38.5) | 0.125  | NR               | 0.022  |
| >UNL (n = 67)                            | 22.7 (9.0–36.4)  |        | 45.8 (31.3–60.2) |        |
| Alb ≥ UNL (n = 179)                      | 30.8 (22.7–38.9) | 0.382  | NR               | 0.142  |
| < UNL (n = 79)                           | 24.5 (10.6–38.4) |        | 39.1             |        |
| β2 MG ≤ 5.5 (n = 167)                    | 32.0 (27.6–36.3) | 0.250  | NR               | <0.001 |
| > 5.5 (n = 91)                           | 19.3 (10.7–28.0) |        | 38.6 (24.2–52.9) |        |
| 1q gain negative (n = 131)               | 41.1 (28.6–53.6) | 0.002  | NR               | 0.048  |
| positive (n = 127)                       | 22.2 (15.8–28.5) |        | 47.4 (34.7–59.5) |        |
| FISH negative (n = 82)                   | 45.7 (27.6–63.8) | 0.002  | NR               | 0.081  |
| 1q gain (n = 34)                         | 29.6 (11.9–47.3) |        | 45.4 (34.2–56.6) |        |
| Others (n = 49)                          | 29.2 (17.6–40.7) |        | 48.2(NE)         |        |
| 1q+others (n = 93)                       | 19.3 (15.3–23.3) |        | 47.1(NE)         |        |
| LDH and 1q                               |                  | <0.001 |                  | 0.001  |
| no LHD and 1q abnormal (n = 111)         | 42.8 (30.0–55.6) |        | NR               |        |
| LDH or 1q abnormal (n = 118)             | 22.5 (18.0–27.1) |        | 47.1             |        |
| LDH and 1q abnormal (n = 29)             | 15.0 (10.8–19.1) |        | 31.1 (20.1–42.0) |        |

UNL: Upper normal limit

Supplementary Table 2 Univariable and multivariable analysis for progression-free survival

| Univariable analysis                    |                  |           | Multivariable analysis                  |                  |           |
|-----------------------------------------|------------------|-----------|-----------------------------------------|------------------|-----------|
| Variable                                | HR (95% CI)      | P         | Variable                                | HR (95% CI)      | P         |
| Age $\geq$ 65 y                         | 1.24 (0.86–1.77) | 0.250     | Plt $<$ 150 $\times$ 10 <sup>9</sup> /L | 1.47 (1.02–2.13) | 0.038     |
| D-S 1–3A vs. 2B+3B                      | 1.67 (1.07–2.62) | 0.024     | Plasma cells $>$ 30%                    | 1.96 (1.36–2.80) | $<$ 0.001 |
| ISS 1+2 vs. 3                           | 1.24 (0.86–1.81) | 0.253     | LDH and 1q                              |                  |           |
| Hgb $<$ 100 g/L                         | 1.18 (0.81–1.70) | 0.390     | no LHD and 1q abnormal                  | 1                | $<$ 0.001 |
| Plt $<$ 150 $\times$ 10 <sup>9</sup> /L | 1.66 (1.16–2.38) | 0.006     | LDH or 1q abnormal                      | 1.82 (1.22–2.72) | 0.004     |
| Cr $>$ 177 $\mu$ mol/L                  | 1.55 (0.95–2.54) | 0.081     | LDH and 1q abnormal                     | 3.22 (1.87–5.52) | $<$ 0.001 |
| LDH $>$ UNL                             | 2.44 (1.63–3.65) | $<$ 0.001 |                                         |                  |           |
| Plasma cells $>$ 30%                    | 2.05 (1.43–2.93) | $<$ 0.001 |                                         |                  |           |
| Extramedullary lesions                  | 1.31 (0.89–1.93) | 0.174     |                                         |                  |           |
| Ca $>$ UNL                              | 1.24 (0.80–1.92) | 0.346     |                                         |                  |           |
| CRP $>$ UNL                             | 1.35 (0.92–1.99) | 0.125     |                                         |                  |           |
| Alb $<$ 35 g/L                          | 1.19 (0.81–1.74) | 0.381     |                                         |                  |           |
| $\beta$ 2MG $>$ 5.5 g/L                 | 1.25 (0.86–1.81) | 0.250     |                                         |                  |           |
| 1q gain positive                        | 1.83 (1.24–2.71) | 0.002     |                                         |                  |           |
| FISH negative                           | 1                | 0.003     |                                         |                  |           |
| 1q gain                                 | 1.80 (0.98–3.31) | 0.058     |                                         |                  |           |
| Others                                  | 1.90 (1.10–3.28) | 0.022     |                                         |                  |           |
| 1q+others                               | 2.42 (1.53–3.85) | $<$ 0.001 |                                         |                  |           |
| LDH and 1q                              |                  |           |                                         |                  |           |
| no LHD and 1q abnormal                  | 1                | $<$ 0.001 |                                         |                  |           |
| LDH or 1q abnormal                      | 1.94 (1.30–2.90) | 0.001     |                                         |                  |           |
| LDH and 1q abnormal                     | 3.37 (1.97–5.76) | $<$ 0.001 |                                         |                  |           |

UNL: Upper normal limit

Supplementary Table 3 Univariable and multivariable analysis for overall survival

| Univariable analysis                    |                  |        | Multivariable analysis                  |                  |       |
|-----------------------------------------|------------------|--------|-----------------------------------------|------------------|-------|
| Variable                                | HR (95% CI)      | P      | Variable                                | HR (95% CI)      | P     |
| Age $\geq$ 65 y                         | 1.88 (1.15–3.07) | 0.011  | D-S 2B+3B vs. 1-3A                      | 1.92 (1.03–3.60) | 0.041 |
| D-S 2B+3B vs. 1-3A                      | 3.01 (1.75–5.19) | <0.001 | ISS 3 vs 1+2                            | 1.80 (1.03–3.17) | 0.041 |
| ISS 3 vs 1+2                            | 2.76 (1.68–4.51) | <0.001 | Plt $<$ 150 $\times$ 10 <sup>9</sup> /L | 2.09 (1.26–3.47) | 0.004 |
| Hgb $<$ 100 g/L                         | 1.43 (0.83–2.45) | 0.194  | LDH and 1q                              |                  |       |
| Plt $<$ 150 $\times$ 10 <sup>9</sup> /L | 2.37 (1.45–3.87) | 0.001  | no LHD and 1q abnormal                  | 1                | 0.042 |
| Cr $>$ 177 $\mu$ mol/L                  | 2.65 (1.48–4.76) | 0.001  | LDH or 1q abnormal                      | 1.84 (1.02–3.34) | 0.045 |
| LDH $>$ UNL                             | 2.60 (1.54–4.39) | <0.001 | LDH and 1q abnormal                     | 2.37 (1.15–4.90) | 0.019 |
| Plasma cells $>$ 30%                    | 2.09 (1.27–3.43) | 0.004  |                                         |                  |       |
| Extramedullary lesions                  | 1.23 (0.71–2.14) | 0.465  |                                         |                  |       |
| Ca $>$ UNL                              | 1.17 (0.64–2.15) | 0.616  |                                         |                  |       |
| Alb $<$ 35 g/L                          | 1.46 (0.88–2.42) | 0.142  |                                         |                  |       |
| $\beta$ 2MG $>$ 5.5 g/L                 | 2.52 (1.54–4.12) | <0.001 |                                         |                  |       |
| 1q gain positive                        | 1.66 (1.00–2.74) | 0.048  |                                         |                  |       |
| FISH negative                           | 1                | 0.092  |                                         |                  |       |
| 1q gain                                 | 1.81 (0.77–4.27) | 0.173  |                                         |                  |       |
| Others                                  | 1.94 (0.90–4.18) | 0.093  |                                         |                  |       |
| 1q+others                               | 2.34 (1.21–4.53) | 0.012  |                                         |                  |       |
| LDH and 1q                              |                  |        |                                         |                  |       |
| no LHD and 1q abnormal                  | 1                | 0.002  |                                         |                  |       |
| LDH or 1q abnormal                      | 1.83 (1.03–3.25) | 0.041  |                                         |                  |       |
| LDH and 1q abnormal                     | 3.48 (1.74–6.98) | <0.001 |                                         |                  |       |

UNL: Upper normal limit
